# Supplementary material for: Postprandial triglyceride-rich lipoproteins-induced premature senescence of adipose-derived mesenchymal stem cells via the SIRT1/p53/Ac-p53/p21 axis through oxidative mechanism
Source: publisher site journal article supplement (doi:10.18632/aging.202298), 2020-12-09
Supplement: Supplementary file [file aging-v12i24-202298-supplementary-material-SD2.pdf]

## SUPPLEMENTARY TABLE

**Supplementary Table 1. The primer sequences used in this study.**

| <b>Gene</b>   | <b>Primer sequence (5'-3')</b>                                        |
|---------------|-----------------------------------------------------------------------|
| GAPDH         | Forward: AAGGTCATCCCAGAGCTGAA<br>Reverse: AGGAGACAACCTGGTCCTCA        |
| IL-1 $\alpha$ | Forward: CGGGTGACAGTATCAGCAACGT<br>Reverse: ATGACAAACTTCTGCCTGACGAG   |
| IL-6          | Forward: TGTATGAACAACGATGATGCA<br>Reverse: AGGACTCTGGCTTTGTCTTTCT     |
| MCP-1         | Forward: TCACCTGCTGCTACTCATTACCA<br>Reverse: TACAGCTTCTTTGGGACACCTGCT |
